# Supplementary material for: The Unequal Distribution of International Climate Finance Flows and Its Underlying Drivers
Source: Research Square preprint supplement (doi:10.21203/rs.3.rs-1188981/v1), 2022-02-09
Supplement: Supplementary file 1 [file 1783fc191e98c35d9bf2f678.xlsx]

## Sheet: README
Jamie Rickman, Sumit Kothari, Francesca Larosa and Nadia Ameli
The Unequal Distribution of International Climate Finance Flows and its Underlying Drivers
This spreadsheet contains figure data for the paper named above. Please cite this data as you would the paper.
This work is licensed under a Creative Commons Attribution-ShareAlike 4.0 International License.									https://creativecommons.org/licenses/by-sa/4.0/
Please contact Jamie Rickman <jamie.rickman@ucl.ac.uk> if you have any questions or comments.

## Sheet: Figure 1
Figure 1
Table 1. Cumulative wind and solar capacity attributed to private finance (MW)
Year	Kenya	Egypt	Peru	Fiji	Nepal	Philippines	Brazil	Cuba	Mexico	Morocco	Dominican Republic	South Africa	Cape Verde	Pakistan	Costa Rica	Algeria	Rwanda	Vietnam	Argentina	Ecuador	Mongolia	Nicaragua	Jordan	Honduras	Ethiopia	Tanzania	Thailand	Senegal	Yemen	Bangladesh	Belize	Sri Lanka	Nigeria	Tonga	Bolivia	Malaysia	El Salvador	Afghanistan	Mauritania	Guatemala	Myanmar	Zimbabwe	Mali	Suriname	Burkina Faso	Uganda	Jamaica	Indonesia	Sierra Leone
2010	0	0	0	0	0	0.5	391.8	0	582.975	10	0	1.8	0	206	34.65	20	0.25	0	14.96	1.2	0	31.5	0	51	60.1	0	45.9	0	0	0	0	0	0	0	0	0	0	0	0	0	0	0	0	0	0	0	0	0	0
2011	0.06	0	22	0	0	0.5	931	0	658.235	10	0	1.8	5	281.6	34.65	30	0.25	0	14.96	1.2	0	31.5	0	51	60.1	0	195.05	0	0	0	0	0	0	1.3	0	0	0	0	0	0	0	0	0	0	0	0	0	0	0
2012	2.61	0	155.75	0	0	30.88	1073.35	0	1146.23	391.3	0	1120.36	5	281.6	34.65	30	0.25	37.6	14.96	1.2	25	53.5	0	51	60.1	0	229.9	0	0	0	0	12	0	1.3	0	7	0	0	0	0	0	0	0	0	0	0	0	0	0
2013	58.01	0	155.75	0	1	133.88	1137.35	1	1614.23	391.3	0	1518.36	5	281.6	59.65	30	0.25	37.6	14.96	1.2	25	53.5	0	51	60.1	0	230.9	0	0	0	0	12	0	1.3	0	52.3	0	0	15	0	170	0	0	0	0	0	0	0	0
2014	213.16	120	163.75	0.9	1	292.11	1431.95	1	2003.18	391.3	1.5	2091.86	5	406.6	109.15	45	4.54	37.6	14.96	2.7	25	53.5	140.665	51	60.1	0	230.9	0	0	0	0	22	0	1.3	0	52.3	0	0	15	6.2	170	0	1.8	5	0	0.6	0	0	3
2015	214.16	120	163.75	0.9	1	732.45	1976.24	1	2200.43	626.3	1.5	2902.46	5	931.6	109.15	45	4.54	37.6	14.96	2.7	25	53.5	235.665	153.9	60.1	77.5	330	0	0	0	0	22	0	1.3	0	111.3	0.74	0	22	6.2	170	100	1.8	5	0	0.6	10	0	3
2016	241.66	120	177.91	0.9	1	748.77	1982.01	1	2480.2	661.3	1.5	3002.46	5	943.6	170.15	45	4.54	137.6	94.96	2.7	70	53.5	483.465	180.4	60.1	77.5	338	79.65	0	3	0	22	0	3.3	0	111.3	60.93	0	22	6.2	170	100	1.8	5	0	10.6	10	42.375	3
2017	281.66	1269.13	177.91	0.9	1	748.77	2378.28	1	3950.16	746.3	1.5	3002.46	5	1142.6	175.15	45	4.54	359.98	223.56	2.7	75.2	53.5	724.515	180.4	60.1	107.5	401	79.65	0	3	0	22	0	3.3	0	382.3	60.93	5	22	37.7	170	100	18.3	5	15	20.6	10	114.375	3
2018	499.56	1436.53	177.91	0.9	1	748.77	2562.88	1	5304.76	946.3	138.48	4541.56	5	1142.6	175.15	45	4.54	2249.99	619.385	2.7	134.2	53.5	974.665	180.4	60.1	113.5	408	179	0	39	0	22	0	3.3	0	411.3	95.93	5	22	37.7	170	100	43.3	5	15	20.6	10	148.975	15.5
2019	632.32	1573.53	196.31	0.9	1	795.75	2930.33	1	7582.9	1025.9	196.48	4591.56	5	1152.6	175.15	45	4.54	2651.99	1115.01	2.7	142.4	53.5	1068.89	193	60.1	113.5	423.3	218.5	0	89	0	22	48	3.3	0	459.3	149.93	5	22	37.7	170	122	79.3	5	15	20.6	10	148.975	15.5
Table 2. Cumulative wind and solar capacity attributed to Public finance (MW)
Year	Kenya	Egypt	Peru	Fiji	Nepal	Philippines	Brazil	Cuba	Mexico	Morocco	Dominican Republic	South Africa	Cape Verde	Pakistan	Costa Rica	Algeria	Rwanda	Vietnam	Argentina	Ecuador	Mongolia	Nicaragua	Jordan	Honduras	Ethiopia	Tanzania	Thailand	Senegal	Yemen	Bangladesh	Belize	Sri Lanka	Nigeria	Tonga	Bolivia	Malaysia	El Salvador	Afghanistan	Mauritania	Guatemala	Myanmar	Zimbabwe	Mali	Suriname	Burkina Faso	Uganda	Jamaica	Indonesia	Sierra Leone
2010	5.1	986.6	0	0	0	33.5	49.3	3.8	136.175	151.3	8.25	5.2	0	102.8	49.95	0	0	0	0	1.2	0	31.5	0	51	60.1	0	111.6	0	0	0	0	0	0	0	0	0	0	0	0	0	0	0	0	0	0	0	0	0	0
2011	5.1	986.6	22	0	0	33.5	50.3	3.8	150.175	151.3	42.25	5.2	30.5	177.5	49.95	0	0	0	6.3	1.2	0	71.1	0	51	111.1	0	131.3	0	0	6	0	21	0	0	0	0	0	0	0	0	0	0	0	0	0	0	0	0	0
2012	7.65	986.6	42	0	0	33.5	97.75	3.8	150.175	231.3	42.25	161.2	30.5	277.5	49.95	0	0	0	31.3	1.2	25	94.48	0	51	264.1	0	204.55	0	60	6	0.48	21	0	0	0	0	0	0	15	0	0	0	0	0	0	0	0	0	0
2013	63.05	986.6	42	0	0	87.5	98.14	3.8	242.775	231.3	42.25	394.2	30.5	380.3	74.95	0	0	0	36.3	1.2	25	94.48	116.9	75	264.1	0	432.64	0	60	6	0.48	21	0	0	0	0	14.2	1.05	30	0	0	0	0	0	0	0	0	0	0
2014	218.2	996.6	143.4	0.9	0	162.5	146.14	3.8	320.325	231.3	42.25	394.2	30.5	454.9	74.95	0	4.29	0	36.3	1.2	25	94.48	195.065	206.5	264.1	0	432.64	0	60	6	0.48	21	1	0	0	0	14.2	1.05	30	52.8	0	0	0	0	33	0	0	0	3
2015	218.2	996.6	143.4	0.9	0	191.1	276.34	3.8	517.575	466.3	42.25	499.7	30.5	1030.7	74.95	0	4.29	24	36.3	1.2	25	94.48	200.565	296.22	264.1	77.5	732.64	0	60	6	0.48	21	1	0	0	0	14.94	1.05	60	52.8	0	0	0	0	33	0	46.3	0	3
2016	245.7	996.6	143.4	0.9	0	191.1	276.34	3.8	696.325	501.3	42.25	499.7	30.5	1080.7	114.95	0	4.29	24	135.3	1.2	50	94.48	475.265	322.72	264.1	77.5	742.64	57.65	60	6	0.48	21	2.65	0	50	0	75.13	1.05	60	52.8	0	0	0	0	33	10	46.3	39.375	3
2017	285.7	1919.7	275.4	0.9	0	191.1	460.49	3.8	1992.33	586.3	42.25	499.7	30.5	1278.6	114.95	0	4.29	45	705.05	1.2	55.2	94.48	711.715	322.72	384.1	77.5	742.64	72.65	60	6	0.48	121	2.65	0	95	0	205.13	26.05	160	52.8	0	0	16.5	0	33	10	46.3	39.375	3
2018	441.7	2207.1	275.4	0.9	25	191.1	494.69	3.8	2297.14	1566.3	121.27	628.7	30.5	1278.6	114.95	0	4.29	194.5	1084.78	1.2	97.7	94.48	789.465	322.72	484.1	77.5	742.64	164.5	60	6	0.48	121	12.65	0	203	0	240.13	26.05	160	52.8	0	0	41.5	0	53	10	97.3	70.875	15.5
2019	519.46	2402.48	293.8	0.9	25	213.5	494.69	15.4667	3001.16	2069.9	121.27	678.7	30.5	1428.6	114.95	0	4.29	390.2	1586.54	1.2	105.9	94.48	920.395	329.2	484.1	77.5	742.64	204	60	106	0.48	121	63.45	0	203	0	240.13	26.05	160	52.8	0	180	91.5	0	261	10	97.3	241.475	15.5
Table 3. Country income class according to world bank classification; UMI (upper middle income), LMI (lower middle income), LI (lower income)
Country	Kenya	Egypt	Peru	Fiji	Nepal	Philippines	Brazil	Cuba	Mexico	Morocco	Dominican Republic	South Africa	Cape Verde	Pakistan	Costa Rica	Algeria	Rwanda	Vietnam	Argentina	Ecuador	Mongolia	Nicaragua	Jordan	Honduras	Ethiopia	Tanzania	Thailand	Senegal	Yemen	Bangladesh	Belize	Sri Lanka	Nigeria	Tonga	Bolivia	Malaysia	El Salvador	Afghanistan	Mauritania	Guatemala	Myanmar	Zimbabwe	Mali	Suriname	Burkina Faso	Uganda	Jamaica	Indonesia	Sierra Leone
WB Class	LMI	LMI	UMI	UMI	LMI	LMI	UMI	UMI	UMI	LMI	UMI	UMI	LMI	LMI	UMI	LMI	LI	LMI	UMI	UMI	LMI	LMI	UMI	LMI	LI	LMI	UMI	LMI	LI	LMI	UMI	LMI	LMI	UMI	LMI	UMI	LMI	LI	LMI	UMI	LMI	LMI	LI	UMI	LI	LI	UMI	UMI	LI
Table 4. Co-ordinates of wind and solar projects installed between 2010 and 2020 using public and private finance
Private		Public
Longitude	Latitude	Longitude	Latitude
35.3206	0.302878	177.498	-17.6245
32.7201	24.428	25.5208	29.2036
-75.4837	-11.4623	-94.7498	16.5839
177.498	-17.6245	23	16.5
85.1516	27.7847	21.2335	-28.4595
-94.7498	16.5839	-109.609	31.3183
-95.0051	16.4157	-116.204	32.6101
23	16.5	-4.04676	34.2525
-116.204	32.6101	18.315	-31.5221
-115.426	31.2954	109.22	13.783
-94.8456	16.2164	107.334	47.5667
-4.04676	34.2525	66.8104	24.9236
107.334	47.5667	35.6534	30.877
33.7785	27.2671	-87.1975	13.8954
-12.9157	27.9331	-85.7944	11.3708
-87.1975	13.8954	120.641	18.5163
120.641	18.5163	68.0105	25.0335
68.0105	25.0335	-94.7032	16.5653
-94.7032	16.5653	-85.7181	11.3256
120.785	18.5604	36.7295	2.75772
-85.7181	11.3256	34.1399	-6.7969
36.7295	2.75772	108.658	11.3179
-42.6389	-13.9587	33.0686	28.1749
24.8452	-33.9915	36.6297	-1.4155
34.1399	-6.7969	39.3813	8.64085
-94.8159	16.4895	100.587	14.2371
36.6297	-1.4155	-48.5376	-27.5998
-39.9996	-2.85834	100.634	15.0386
-40.2726	-2.81919	-23.5112	14.9827
-40.2753	-2.83908	-67.5097	-46.4546
-39.9546	-2.91611	-66.9011	-44.9322
-39.9824	-2.86011	-9.72397	28.1404
-39.9841	-2.88536	-73.8167	-15.7333
-39.9809	-2.88365	-72.1665	-16.3684
-36.9147	-4.99572	-71.3399	-17.662
-36.9288	-4.98567	-70.2749	-18.0254
-36.9147	-5.02298	-16.8812	15.0463
-36.9146	-5.01033	33.7855	27.2626
-39.6292	-3.06694	43.2496	13.2976
-39.2253	-3.2697	-71.4506	19.7306
-39.2483	-3.25899	-55.5323	-30.8897
-39.2362	-3.24494	-55.5323	-30.8897
-37.9034	-4.97719	35.9407	31.9637
-39.3273	-3.20383	-41.3998	-11.8051
-36.9178	-4.97361	-41.3726	-11.7334
-42.6142	-14.1141	-41.3621	-11.6643
-37.6885	-4.56339	-6.91787	30.9674
-52.221	-32.1873	68.0047	25.013
-52.2102	-32.1988	67.9827	25.0077
-52.221	-32.1873	68.0047	25.013
-42.5601	-14.1244	68.0047	25.013
100.587	14.2371	68.0208	25.0466
-38.9823	-3.43831	67.0011	24.8607
-94.8159	16.4895	101.55	15.5914
-65.2491	-43.1169	121.33	14.4688
-65.2491	-43.1169	101.877	16.0086
-65.2491	-43.1169	67.5223	24.7513
-66.9011	-44.9322	68.0047	25.013
-81.2705	-4.59933	68.0047	25.013
-79.4726	-7.25422	-43.9708	-19.8658
-73.8167	-15.7333	-88.7605	17.2429
-72.1665	-16.3684	-68.8619	-32.0523
-71.3399	-17.662	100.53	14.3304
-70.2749	-18.0254	79.7312	8.0005
25.9298	-32.7441	79.7314	8.0005
18.3805	-33.3763	-103.17	23.21
-16.8812	15.0463	-70.309	18.298
26.3717	-31.39	-67.6916	-45.7494
20.0225	-33.3379	-98.2294	25.9361
100.942	13.0657	92.2256	22.4931
35.9407	31.9637	102.318	15.1686
-41.3998	-11.8051	101.868	17.2412
-41.3726	-11.7334	7.46229	9.03946
-41.3621	-11.6643	22.9411	-27.6251
23.9881	-30.6587	19.3918	-29.1342
90.4005	24.7427	21.1891	-28.4503
-41.1528	-3.85778	36.7065	-0.61165
-35.9761	-5.30811	-85.7268	11.3377
-35.9857	-5.31758	-75.141	-15.3634
-35.9564	-5.36533	-71.3455	-17.6657
-35.943	-5.25286	-64.6725	-21.6933
-35.9735	-5.27692	68.0089	25.0228
-41.1642	-3.85194	102.423	15.5831
-41.1838	-3.88072	102.423	15.5831
-41.1769	-3.83222	102.802	16.729
-6.91787	30.9674	102.802	16.729
-42.6107	-14.0969	102.62	15.9708
-42.6055	-14.1191	102.62	15.9708
68.0047	25.013	102.423	15.5831
68.0047	25.013	102.802	16.729
-44.234	-19.4786	102.802	16.729
122.052	11.8408	101.868	17.2412
101.55	15.5914	-43.2302	-22.9122
101.877	16.0086	-88.5514	13.617
68.0082	25.0196	91.1335	22.2881
-42.679	-14.1043	25.1436	-28.5586
-0.050901	28.4557	39.6459	-0.39087
-95.0045	16.4338	67.8174	34.8157
100.034	13.4914	-15.9635	18.0805
100.304	14.1084	39.4436	8.61599
39.6652	-4.03263	-43.9708	-19.8658
-103.17	23.21	-87.1975	13.8954
24.7632	-28.6487	-86.8	13.2667
102.105	14.993	-86.3664	11.6771
-94.9415	16.243	-110.221	24.0869
184.741	-21.1418	-100.643	26.2412
24.0414	-30.6306	-98.9849	23.8943
21.484	-28.4669	-98.7561	23.7722
-84.9567	10.4804	-98.7561	23.7722
19.3918	-29.1342	-98.9092	23.8224
21.1891	-28.4503	-90.5766	14.3757
100.596	13.795	-6.91787	30.9674
36.7065	-0.61165	-6.91787	30.9674
100.876	15.0539	100.172	14.1047
24.0072	-30.6225	100.172	14.1047
22.714	-29.7008	100.176	14.1125
-85.7268	11.3377	100.138	14.135
-71.3455	-17.6657	100.143	14.1358
20.3651	-27.4608	100.065	14.4324
24.021	-30.6156	101.479	15.7126
23.8626	-29.1369	101.479	15.7126
21.8035	-29.0406	101.479	15.7126
68.01	25.01	101.479	15.7126
26.2183	-29.0676	101.639	15.4502
23.0552	-28.3281	35.4573	30.9464
104.814	14.7639	100.285	15.2631
104.816	14.7639	-84.9678	10.467
23.1515	-31.741	-84.9678	10.467
120.59	15.2202	-85.4377	10.635
102.255	14.8882	-85.4377	10.635
99.7233	19.8737	-3.61038	21.6166
101.949	2.63271	19.3919	-29.1343
21.5951	-28.4422	-9.50237	13.0342
101.57	2.83884	39.1354	7.93046
25.6764	-33.754	25.6623	-33.7243
101.098	14.4977	-15.8767	18.1002
103.741	15.9033	-55.5282	-30.8741
23.0551	-28.2974	-85.4483	10.8731
24.0246	-30.5291	-1.78224	12.3527
26.2995	-30.9569	-77.6809	17.9648
21.3759	-28.3956	-5.72535	35.7666
-100.537	25.6821	-9.50297	13.0325
79.8209	7.89129	123.976	0.577459
100.162	16.4167	-13.2195	8.47144
101.01	15.7676	30.0761	-1.9919
25.1436	-28.5586	37.6822	0.136642
39.6459	-0.39087	117.359	-8.65027
-100.884	22.0362	73.1037	33.7292
-71.75	19.7	35.7369	30.1908
-90.3108	-0.751265	35.7369	30.1908
124.613	11.007	36.1978	32.3166
-94.9738	16.3997	-101.006	25.5608
100.482	13.7314	120.647	18.5163
-94.977	16.5448	33.7771	-13.7833
-100.643	26.2412	-2.69873	10.5256
-98.7356	25.7489	-77.2838	17.9545
-98.7231	25.7796	-5.55	33.8833
-98.9849	23.8943	-3.72623	33.3265
-98.9092	23.8224	-89.833	13.5899
-6.91787	30.9674	-87.161	13.3201
-6.91787	30.9674	-99.0251	23.3176
-95.0051	16.4157	-99.0265	23.319
94.87	20.18	188.198	-13.8461
29.0119	-20.9432	67.5845	24.746
-88.9345	21.3574	35.743	30.1962
99.7256	18.6957	-44.1072	-12.5881
103.079	16.7061	-44.1071	-12.593
-82.2851	23.0906	-44.0997	-12.5941
35.4573	30.9464	-44.0925	-12.6
-42.4782	-14.136	-44.1029	-12.5994
-42.4748	-14.1091	-44.1108	-12.6021
-40.633	-7.33	-44.118	-12.6011
-40.7542	-7.48299	36.6652	-1.4199
-40.658	-7.445	-86.5	15
-40.658	-7.445	36.3071	31.1481
-40.658	-7.445	-87.15	13.3167
-40.7674	-7.47479	35.0397	29.5722
101.646	2.71941	-87.161	13.3201
101.655	2.71495	-87.161	13.3201
-84.9678	10.467	200.219	-21.2099
-84.9678	10.467	-4.7302	32.6874
-85.4377	10.635	34.1816	0.690922
-85.4377	10.635	33.611	1.71327
-3.61038	21.6166	-86.5	15
120.94	13.4667	23.0811	-28.3146
123.435	10.5132	-67.2164	-17.6423
123.434	10.5187	110.14	44.899
19.7078	-30.3824	32.6503	29.108
25.0951	-30.8315	21.2963	-28.4254
19.3919	-29.1343	21.2887	-28.4254
-9.50237	13.0342	21.2886	-28.426
22.7166	-29.6785	125.346	6.76687
22.7166	-29.6785	71.6836	29.3956
25.6623	-33.7243	32.8737	24.4424
23.0806	-26.5787	32.8787	24.4443
27.9995	-23.0904	32.5472	24.1371
28.4748	-22.8977	32.886	24.4556
-15.8767	18.1002	107.3	47.6
25.8285	-32.7503	-95.0183	16.433
24.0865	-30.6748	-98.3167	25.75
-42.4758	-14.0993	32.8836	24.4448
-39.8407	-2.92138	32.889	24.4479
-39.8618	-2.91995	-6.24423	13.431
-39.8369	-2.94639	75.2579	30.1364
-39.8795	-2.9653	71.9317	29.279
-85.4483	10.8731	-44.9215	-17.4123
-55.1558	5.07694	-44.8972	-17.4126
32.2707	-0.406491	-44.9	-17.4142
120.51	18.0028	-44.9038	-17.4141
-38.1507	-9.0984	-44.9151	-17.4136
-38.1507	-9.0984	-6.94439	30.939
-5.72535	35.7666	32.4847	28.8026
-9.50297	13.0325	119.863	-3.9526
101.695	2.75507	-40.98	-9.17
123.976	0.577459	-12.6146	27.6861
-13.2195	8.47144	-12.6026	27.6788
30.0761	-1.9919	-4.72623	32.6911
35.9405	31.689	-4.72623	32.6911
100.716	5.59563	-15.3999	16.5234
117.359	-8.65027	16.914	-24.5459
19.3566	-30.5139	7.61816	12.9693
35.7369	30.1908	35.7256	-6.15287
24.6544	-34.1206	28.6067	-14.8067
35.7369	30.1908	28.6067	-14.8067
72.8376	3.47123	-75.0667	-15.2
122.937	10.4233	30.0255	-3.41542
36.1978	32.3166	34.1816	0.690922
-101.006	25.5608	33.611	1.71327
120.647	18.5163	-78.5003	-7.16378
71.684	29.3946	-78.5003	-7.16378
-36.7313	-8.18178	68.005	25.0249
-36.7535	-8.18336	-15.9635	18.0805
-35.493	-7.4875	35.4357	30.1019
-39.8872	-2.96933	35.9352	32.5387
-39.9008	-2.94822	120.96	15.07
-39.8939	-2.96047	36.2229	32.3617
-39.8973	-2.97679	36.2267	32.3678
-39.8998	-2.98839	36.2302	32.3665
100.141	6.39846	-16.7627	15.0785
101.657	3.11241	32.6575	29.1152
18.4408	-32.2523	32.9248	24.0919
-77.2838	17.9545	32.8514	24.4545
124.725	6.34602	32.8514	24.4545
-99.0251	23.3176	-67.4808	-45.8647
-99.0265	23.319	-78.0811	18.2213
17.0787	-22.5243	35.6914	30.1953
80.0255	9.6615	35.1723	0.099271
67.5845	24.746	-111.717	29.1667
35.743	30.1962	36.1979	32.35
-51.5917	-21.4661	35.3742	29.9547
-44.1072	-12.5881	35.8865	31.9753
-44.1071	-12.593	35.9377	31.9712
-44.0997	-12.5941	106.112	11.0643
-44.0925	-12.6	-102.167	22.2167
-44.1029	-12.5994	-102.005	21.2067
-44.1108	-12.6021	-103.308	25.4328
-44.118	-12.6011	-101.906	22.8308
-51.587	-21.4508	-107.011	31.7628
-51.5883	-21.4553	-66.8272	-24.0667
36.6652	-1.4199	-66.8272	-24.0667
-7.28705	15.1766	-66.8272	-24.0667
36.3071	31.1481	-66.3192	-24.2256
-87.15	13.3167	-62.2667	-38.7167
35.0397	29.5722	-62.6189	-39.9172
123.431	10.5239	-62.2667	-38.7167
123.133	10.9507	-66.6667	-44.6667
34.1816	0.690922	-62.7	-38.8167
33.611	1.71327	-68.0622	-45.7894
123.091	9.63303	-68.95	-46.55
-86.5	15	-65.05	-42.7667
23.0097	-27.7912	-62.6167	-39.25
23.0811	-28.3146	-68.0592	-38.9514
123.432	10.517	36.9618	-16.8399
2.93148	11.1307	35.9242	32.0163
-13.3919	20.5214	-69.2042	-30.3231
-14.3976	19.7363	-58.7333	-38.55
-14.3988	19.7373	-65.6833	-39.2667
-87.3094	13.2881	-65	-33.1667
122.933	10.4208	100.196	13.6472
110.14	44.899	100.196	13.6472
32.6503	29.108	160.051	-9.42806
-85.355	10.4958	-16.856	21.3227
7.95371	36.2895	68.0064	25.1174
21.2963	-28.4254	68.0064	25.1174
21.2887	-28.4254	68.0064	25.1174
21.2886	-28.426	7.99157	16.9751
28.5969	-26.1962	168.745	7.4195
21.2533	-30.2744	-63.1667	-17.5167
26.2617	-32.6064	-63.25	-17.8333
120.694	15.3328	-63.4	-18.7667
120.883	14.4152	-88.5	13.3833
-15.1838	13.5778	-89.8336	13.59
24.7485	-28.7608	34.6321	25.3101
123.307	10.9585	3.40771	6.43916
17.7237	-29.5887	36.2336	30.5932
19.3524	-33.3908	36.1983	32.3149
18.1859	-29.0721	-101.259	21.0186
21.517	-29.5077	-100.744	20.9153
22.3343	-29.9534	-87.18	13.3547
27.2943	-32.8759	-107.632	30.1092
71.6836	29.3956	-111.1	30.1667
32.8737	24.4424	-89.8336	13.59
32.8787	24.4443	-89.8336	13.59
32.5472	24.1371	-87.1388	13.2226
-102.275	22.2083	-89.1794	13.4658
-105.196	27.7178	-88.9797	13.4954
32.886	24.4556	-88.0094	15.5623
107.3	47.6	-112.054	30.6764
-99.0261	23.3177	-106.608	30.6093
32.8836	24.4448	-7.09777	31.7933
32.889	24.4479	116.644	-8.53738
-6.24423	13.431	116.259	-8.80797
-89.6117	21.2533	116.526	-8.66623
75.2579	30.1364	-88.9167	13.8333
101.522	13.9332	32.9248	24.0919
100.113	15.1336	32.8825	24.4403
101.542	13.8934	-5.81864	9.52628
125.113	7.76631	-17.3323	14.7534
71.9317	29.279	42.5714	10.7522
21.5585	-32.5395	38.9156	15.3279
22.1381	-29.885	36.202	32.3417
27.3534	-25.675	79.8281	9.05587
22.1381	-29.885	33.7942	-13.9673
-48.538	-9.541	35.7509	30.8353
35.7416	30.196	32.8781	24.4415
124.953	11.1681	187.336	-13.7512
119.919	-9.64585	65.8988	31.6157
121.606	-8.80284	35.3518	0.417738
122.208	-8.61987	32.8882	24.4463
-6.94439	30.939	32.8886	24.4307
120.648	15.4396	32.8849	24.4333
-41.3397	-11.1071	32.8992	24.0899
-41.3295	-11.0811	32.8998	24.0898
-41.3399	-11.1038	32.8756	24.4502
-41.3391	-11.0954	32.887	24.4562
-41.3126	-11.0845	32.8999	24.0898
-41.3093	-11.1045	32.8847	24.4385
-41.2989	-11.0866	32.8847	24.4385
-41.3325	-11.0697	32.8847	24.4385
32.4847	28.8026	47.5108	-18.8817
-0.666137	5.43478	33.1631	28.1462
119.863	-3.9526	69.3451	30.3753
100.343	15.2822	106.906	47.8864
101.432	13.7437	-16.9428	14.7377
-47.0681	-17.2302	-16.0276	14.1788
-47.0681	-17.2206	-65.05	-42.7667
-38.3908	-3.90083	-65.05	-42.7667
-47.0789	-17.2273	-62.2667	-38.7167
-47.0939	-17.2254	-66.3192	-24.2256
99.9431	13.0804	67.71	33.9391
99.0151	18.0443	107.291	-6.71916
-43.63	-15.3497	-65.05	-42.7667
-43.6272	-15.3419	32.8836	24.4448
-12.6146	27.6861	-0.957949	12.3641
-12.6026	27.6788	32.8844	24.4407
-15.3999	16.5234	-69.7232	-39.8477
16.914	-24.5459	101.639	15.451
7.61816	12.9693	-75.3686	10.4456
35.7256	-6.15287	36.0846	31.8964
28.6067	-14.8067	-73.0833	6.91666
28.6067	-14.8067	-73.2436	10.4742
34.1816	0.690922	32.8992	24.0899
33.611	1.71327	35.9304	31.9632
-78.5003	-7.16378	68	25.02
-78.5003	-7.16378	-15.4004	14.7738
35.4357	30.1019	-89.0539	13.4417
35.9352	32.5387	68	25.02
36.2267	32.3678	85.16	27.91
36.2302	32.3665	32.6443	29.1196
-87.9833	21.4333	-98.5817	25.7833
-16.7627	15.0785	32.9215	24.1007
32.6575	29.1152	-87.8439	13.3369
32.9248	24.0919	110.122	44.9046
32.8514	24.4545	32.8667	24.453
32.8514	24.4545	106.919	47.9212
14.9753	-22.4171	32.8793	24.0974
14.9753	-22.4171	40.0427	-3.24262
15.1719	-26.6402	8.34635	4.92633
-9.00612	32.7206	-71.75	19.7
-9.00612	32.7206	32.9215	24.4794
102.49	13.6791	-87.8439	13.3369
35.6914	30.1953	-88.9	13.7167
35.1723	0.099271	109.199	13.5809
101.655	2.71495	109.199	13.5809
105.975	49.4648	-4.00311	33.0479
109.164	11.7032	-5.84623	30.3305
-111.717	29.1667	91.4	22.94
22.8431	16.0659	0.330585	5.88851
36.1979	32.35	30.0806	26.539
35.3742	29.9547	-16.5899	13.4577
35.8865	31.9753	106.088	11.1506
35.9377	31.9712	-65.05	-42.7667
117.195	-4.8234	-6.48913	9.52428
106.112	11.0643	35.6869	30.1594
-102.275	22.2083	-12.1241	8.85347
-112.055	30.6781	-5.68688	11.331
-103.25	25.5333	34.2826	-12.9309
-102.005	21.2067	-63.1678	-17.5163
-102.283	21.8823	34.4569	-13.7746
-103.308	25.4328	35.6843	30.7254
-101.906	22.8308	29.8517	-18.0788
-107.011	31.7628	31.1679	-20.6255
-66.3192	-24.2256	29.8954	-18.3506
-62.2667	-38.7167	39.8541	-12.9811
-62.6189	-39.9172	30.051	-20.3164
-62.2667	-38.7167	105.153	11.4647
-68.0622	-45.7894	107.679	11.0981
-68.95	-46.55	106.676	16.6496
-65.05	-42.7667	34.7402	-1.01985
-62.6167	-39.25	37.4961	0.577592
-68.0592	-38.9514	107.014	47.6108
36.9618	-16.8399	35.2489	0.504305
89.9463	24.925	-5.68224	11.33
105.29	8.77	108.658	11.3179
108.38	11.2552	36.2239	32.3404
108.658	11.3179	8.14248	6.13265
35.6315	30.6785	-69.7232	-39.8477
35.9242	32.0163	104.74	11.8192
-65.9667	-26.0833	-79.0686	22.2417
-69.2042	-30.3231	-77.9151	21.3888
-68.7194	-31.4644	-81.5775	23.0411
-66.3525	-33.2772	107.622	13.9539
-57.8333	-38.2667	35.9367	31.7199
-60.2667	-38.3667	-17.4755	14.7187
-58.7333	-38.55	-17.4757	14.7215
-65.05	-42.7667	-4.55609	33.1853
108.915	11.4702	-3.60917	31.9572
15.8632	-21.9375	-7.99333	29.7546
160.051	-9.42806	-11.0899	28.4264
103.138	4.96479	-2.02369	34.0008
102.358	2.28928	-3.03948	32.0313
100.482	5.81189	-87.953	15.6144
18.9751	-22.3973	68.009	25.0243
105.009	10.5491	-1.53543	12.3626
103.102	3.70699	-0.03028	14.0385
168.745	7.4195	1.78446	12.0675
-89.4428	14.3314	-3.17542	10.3265
-88.5	13.3833	34.2826	-12.9309
36.2336	30.5932	-65.0348	-42.7878
48.5636	34.8522
34.9282	-0.569553
0.079291	14.3756
36.1983	32.3149
-69.3399	18.5063
-99.735	20.1867
-105.159	27.6583
-104.143	26.5567
-102.213	21.8264
-110.342	24.1214
-101.259	21.0186
-100.744	20.9153
-107.632	30.1092
-89.8336	13.59
-89.8336	13.59
-87.1388	13.2226
-89.1794	13.4658
-89.586	15.0438
-88.9797	13.4954
-100.067	24.8333
-104.658	24.0203
-106.883	31.6028
-106.883	31.6028
-100.188	20.628
-112.054	30.6764
-106.648	30.539
-106.069	28.633
-106.648	30.539
-106.648	30.539
-106.648	30.539
-104.466	24.1664
-104.46	24.1542
-104.454	24.1604
-90.4892	19.8671
-106.608	30.6093
101.866	12.7437
-102.183	21.7333
-101.717	21.8167
-88.8167	19.8833
-112.725	30.79
-71.65	19.85
116.644	-8.53738
116.259	-8.80797
116.526	-8.66623
-106.483	30.1667
-104.583	24
-104.583	24
-104.583	24
35.7117	30.1951
36.8155	31.8119
32.9248	24.0919
32.8825	24.4403
-5.81864	9.52628
101.424	13.2377
35.7929	-4.90669
184.748	-21.1466
-17.3323	14.7534
120.604	15.5297
73.396	1.97722
105.313	20.1291
36.202	32.3417
67.9902	25.0525
53.688	32.4279
29.9005	26.7876
29.9005	26.7876
33.7942	-13.9673
35.7509	30.8353
109.164	11.7032
32.8781	24.4415
-85.65	10.2667
106.417	17.1261
18.1229	-26.5632
187.336	-13.7512
187.336	-13.7512
65.8988	31.6157
35.3518	0.417738
32.8882	24.4463
32.8886	24.4307
32.8849	24.4333
32.8992	24.0899
32.8998	24.0898
17.2201	-19.8928
32.8756	24.4502
32.887	24.4562
32.8999	24.0898
32.8847	24.4385
32.8847	24.4385
32.8847	24.4385
71.82	32.09
33.1631	28.1462
51.7068	32.5898
69.3451	30.3753
106.906	47.8864
-16.0276	14.1788
35.9387	31.9707
-66.3192	-24.2256
-98.9833	23.4
-102.317	22.1
-102.125	21.8583
-103.05	23.5667
106.7	10.1597
100.653	14.7995
99.253	5.80964
-69.15	-30.1833
32.8836	24.4448
48.9942	34.8599
48.9958	35.0716
48.7636	35.0947
48.7131	34.4899
108.977	11.6653
-89.651	14.4983
100.365	5.94629
106.66	10.7626
32.8844	24.4407
-98.8233	23.33
37.3722	0.069836
16.9521	-22.5561
35.2605	0.495413
36.9927	-6.83698
36.0846	31.8964
32.8992	24.0899
35.9304	31.9632
48.51	34.79
48.51	34.79
-15.4004	14.7738
108.974	11.4109
-43.667	-16.3096
-43.6654	-16.3023
-43.6634	-16.2976
-43.68	-15.34
107.866	12.6573
-6.93296	30.9464
-89.0539	13.4417
55.89	26.81
35.9889	31.9183
100.263	6.5213
106.365	11.0308
109.22	13.783
109.055	14.0134
-98.5817	25.7833
47.2014	-21.1022
-107.933	31
-104.65	24.365
-100.963	22.6217
32.9215	24.1007
106.11	11.3352
110.122	44.9046
18.3819	-20.6051
106.11	11.3352
111.905	43.7158
114.555	0.961883
10.4494	32.9233
32.8667	24.453
36.7877	-1.34176
88.5496	26.3345
17.464	-19.5154
33.5602	0.361971
32.8992	24.0898
106.919	47.9212
32.8793	24.0974
106.66	10.7626
40.0427	-3.24262
56	30.35
36.8631	30.897
51.566	35.2631
52.0603	35.6924
35.8471	31.7537
104.794	-3.01399
109.115	13.068
-71.75	19.7
105.975	49.4648
32.9215	24.4794
101.133	12.6789
0.330585	5.88851
30.0806	26.539
-16.7956	14.436
92.2	21.05
108.855	11.485
35.6869	30.1594
-12.1241	8.85347
109.055	14.0134
34.2826	-12.9309
31.0284	-17.8905
108.38	12.744
109.14	12.0754
34.4569	-13.7746
35.6843	30.7254
39.8541	-12.9811
106.365	11.0328
105.184	10.5003
105.184	10.5003
105.009	10.5491
39.5971	-4.03657
68	25.02
48.4178	35.5372
36.095	31.9821
32.1473	29.7912
49.3226	36.1123
105.153	11.4647
104.573	10.6723
104.573	10.6723
107.764	13.5419
106.486	10.6412
108.658	11.3179
109.192	11.9662
108.915	11.4702
34.7402	-1.01985
37.4961	0.577592
107.014	47.6108
35.2489	0.504305
68.4949	25.8053
10.4382	32.9342
-36.085	-5.25212
-36.0572	-5.25456
34.278	27.8584
14.2401	32.6585
108.261	10.9805
99.168	9.04867
108.658	11.3179
32.8027	-25.4042
13.5615	7.32537
108.38	11.2552
108.658	11.3179
-4.97697	14.5851
-36.9989	-5.02069
-37.0396	-5.01263
106.598	17.4659
122.161	18.4821
100.502	13.7563
-17.4755	14.7187
-17.4757	14.7215
-70.5609	18.4019
0.97671	8.32155
105.247	12.1495
105.247	12.1495
105.98	9.32496
105.98	9.32496
101.502	12.9864
100.483	14.05
34.2826	-12.9309
-87.9833	21.4333
-88.1104	15.4057
-87.65	14.46
35.9404	31.9518
45.3096	2.03743
[truncated: 27 more columns]

## Sheet: Figure 2
Fig. 2
Table 1. Drivers of public and private sector investment
	Private network, pre-Paris							Private network, post-Paris
	𝜃	𝜃 std	p-value	N	𝜌	LogL		𝜃	𝜃 std	p-value	N	𝜌	LogL
EF	2.95029	0.157795	6.74301e-41	280	0.48	-908		2.25193	0.149131	9.03499e-18	422	0.42	-1573
Elec Access	2.44549	0.326354	0.000161009	280	0.16	-1017		2.50195	0.247115	5.60833e-12	422	0.33	-1591
RISE	4.18869	1	6.07279e-20	280	0.29	-966		3.6508	0.246429	1.01985e-25	422	0.35	-1549
ND Vuln	-2.95379	0.282207	1.1337e-11	280	0.34	-991		-2.98958	0.256872	7.02168e-13	422	0.42	-1588
EDB	2.44315	0.318585	0.0430526	280	0.19	-1030		3.3646	0.31702	1.65239e-07	422	0.41	-1607
LogCap Pub	0.37242	0.0272379	1.35052e-22	280	0.59	-958		0.322767	0.0217644	6.66657e-29	422	0.61	-1540
LogCap Pri	0.413253	0.0245469	3.69755e-40	280	0.71	-910		0.342284	0.0213539	4.34133e-36	422	0.67	-1520
LogCap Tot	0.42683	0.0274107	2.41873e-39	280	0.66	-912		0.361705	0.0228488	7.90959e-39	422	0.7	-1512
	Public network, pre-Paris							Public network, post-Paris
	𝜃	𝜃 std	p-value	N	𝜌	LogL		𝜃	𝜃 std	p-value	N	𝜌	LogL
EF	2.59652	0.216287	3.53447e-10	170	0.35	-564		1.64318	0.219788	0.64283	284	0.14	-1099
Elec Access	1.85495	0.358851	0.558998	170	0.25	-605		1.64937	0.244894	0.275588	284	0.14	-1094
RISE	1.72281	0.395846	0.997106	170	0.14	-614		2.727	0.274951	6.71699e-06	284	0.27	-1068
ND Vuln	-1.66853	0.300192	0.659195	170	0.22	-606		-2.69379	0.292517	0.000191712	284	0.2	-1075
EDB	2.45804	0.414614	0.495279	170	0.13	-604		2.27524	0.403289	0.970169	284	0.16	-1105
LogCap Pub	0.301749	0.0372699	0.00105501	170	0.52	-588		0.323484	0.0289207	6.53901e-11	284	0.45	-1050
LogCap Pri	0.288797	0.0335341	2.3625e-06	170	0.51	-577		0.236994	0.0232955	4.3162e-06	284	0.41	-1068
LogCap Tot	0.304143	0.0335341	2.04913e-06	170	0.55	-577		0.278081	0.0262304	1.55108e-08	284	0.43	-1058

## Sheet: Figure 3
Figure 3
Table 1. Investment suitability features averaged per income group and across time (2010-2019), see 'Supplementary Materials - Feature Data'
EF 2	EDB	Elec Access	RISE	ND Vuln
0.227037	0.67448	0.94064	0.555771	0.228182
0.11604	0.597292	0.761924	0.54869	0.382303
0.0131109	0.404141	0.285846	0.320871	0.675588

## Sheet: Figure 4
Figure 3
Table 1. Country income class according to world bank classification; UMI (upper middle income), LMI (lower middle income), LI (lower income)
Country	Kenya	Egypt	Peru	Fiji	Nepal	Philippines	Brazil	Cuba	Mexico	Morocco	Dominican Republic	South Africa	Cape Verde	Pakistan	Costa Rica	Algeria	Rwanda	Vietnam	Argentina	Ecuador	Mongolia	Nicaragua	Jordan	Honduras	Ethiopia	Tanzania	Thailand	Senegal	Yemen	Bangladesh	Belize	Sri Lanka	Nigeria	Tonga	Bolivia	Malaysia	El Salvador	Afghanistan	Mauritania	Guatemala	Myanmar	Zimbabwe	Mali	Suriname	Burkina Faso	Uganda	Jamaica	Indonesia	Sierra Leone
WB Class	LMI	LMI	UMI	UMI	LMI	LMI	UMI	UMI	UMI	LMI	UMI	UMI	LMI	LMI	UMI	LMI	LI	LMI	UMI	UMI	LMI	LMI	UMI	LMI	LI	LMI	UMI	LMI	LI	LMI	UMI	LMI	LMI	UMI	LMI	UMI	LMI	LI	LMI	UMI	LMI	LMI	LI	UMI	LI	LI	UMI	UMI	LI
Table 2. Country Longitude and Latitude, source: https://developers.google.com/public-data/docs/canonical/countries_csv
Country	Kenya	Egypt	Peru	Fiji	Nepal	Philippines	Brazil	Cuba	Mexico	Morocco	Dominican Republic	South Africa	Cape Verde	Pakistan	Costa Rica	Algeria	Rwanda	Vietnam	Argentina	Ecuador	Mongolia	Nicaragua	Jordan	Honduras	Ethiopia	Tanzania	Thailand	Senegal	Yemen	Bangladesh	Belize	Sri Lanka	Nigeria	Tonga	Bolivia	Malaysia	El Salvador	Afghanistan	Mauritania	Guatemala	Myanmar	Zimbabwe	Mali	Suriname	Burkina Faso	Uganda	Jamaica	Indonesia	Sierra Leone
Longitude	38	30	-76	175	84	122	-55	-80	-102	-5	-70.6667	24	-24	70	-84	3	30	106	-64	-77.5	105	-85	36	-86.5	38	35	100	-14	48	90	-88.75	81	8	185	-65	112.5	-88.9167	65	-12	-90.25	98	30	-4	-56	-2	32	-77.5	120	-11.5
Latitude	1	27	-10	-18	28	13	-10	21.5	23	32	19	-29	16	30	10	28	-2	16	-34	-2	46	13	31	15	8	-6	15	14	15	24	17.25	7	10	-20	-17	2.5	13.8333	33	20	15.5	22	-20	17	4	13	1	18.25	-5	8.5
Table 3. Country Longitude and Latitude, source: https://developers.google.com/public-data/docs/canonical/countries_csv
	Kenya	Egypt	Peru	Fiji	Nepal	Philippines	Brazil	Cuba	Mexico	Morocco	Dominican Republic	South Africa	Cape Verde	Pakistan	Costa Rica	Algeria	Rwanda	Vietnam	Argentina	Ecuador	Mongolia	Nicaragua	Jordan	Honduras	Ethiopia	Tanzania	Thailand	Senegal	Yemen	Bangladesh	Belize	Sri Lanka	Nigeria	Tonga	Bolivia	Malaysia	El Salvador	Afghanistan	Mauritania	Guatemala	Myanmar	Zimbabwe	Mali	Suriname	Burkina Faso	Uganda	Jamaica	Indonesia	Sierra Leone
Private	214.16	120	163.75	0.9	1	732.45	1976.24	1	2200.43	626.3	1.5	2902.46	5	931.6	109.15	45	4.54	37.6	14.96	2.7	25	53.5	235.665	153.9	60.1	77.5	330	0	0	0	0	22	0	1.3	0	111.3	0.74	0	22	6.2	170	100	1.8	5	0	0.6	10	0	3
Public	218.2	996.6	143.4	0.9	0	191.1	276.34	3.8	517.575	466.3	42.25	499.7	30.5	1030.7	74.95	0	4.29	24	36.3	1.2	25	94.48	200.565	296.22	264.1	77.5	732.64	0	60	6	0.48	21	1	0	0	0	14.94	1.05	60	52.8	0	0	0	0	33	0	46.3	0	3
Table 4. Wind and solar installed capacity in 2015 (MW)
	Kenya	Egypt	Peru	Fiji	Nepal	Philippines	Brazil	Cuba	Mexico	Morocco	Dominican Republic	South Africa	Cape Verde	Pakistan	Costa Rica	Algeria	Rwanda	Vietnam	Argentina	Ecuador	Mongolia	Nicaragua	Jordan	Honduras	Ethiopia	Tanzania	Thailand	Senegal	Yemen	Bangladesh	Belize	Sri Lanka	Nigeria	Tonga	Bolivia	Malaysia	El Salvador	Afghanistan	Mauritania	Guatemala	Myanmar	Zimbabwe	Mali	Suriname	Burkina Faso	Uganda	Jamaica	Indonesia	Sierra Leone
Private	214.16	120	163.75	0.9	1	732.45	1976.24	1	2200.43	626.3	1.5	2902.46	5	931.6	109.15	45	4.54	37.6	14.96	2.7	25	53.5	235.665	153.9	60.1	77.5	330	0	0	0	0	22	0	1.3	0	111.3	0.74	0	22	6.2	170	100	1.8	5	0	0.6	10	0	3
Public	218.2	996.6	143.4	0.9	0	191.1	276.34	3.8	517.575	466.3	42.25	499.7	30.5	1030.7	74.95	0	4.29	24	36.3	1.2	25	94.48	200.565	296.22	264.1	77.5	732.64	0	60	6	0.48	21	1	0	0	0	14.94	1.05	60	52.8	0	0	0	0	33	0	46.3	0	3
Table 5. Wind and solar installed capacity in 2015 (MW)
	Kenya	Egypt	Peru	Fiji	Nepal	Philippines	Brazil	Cuba	Mexico	Morocco	Dominican Republic	South Africa	Cape Verde	Pakistan	Costa Rica	Algeria	Rwanda	Vietnam	Argentina	Ecuador	Mongolia	Nicaragua	Jordan	Honduras	Ethiopia	Tanzania	Thailand	Senegal	Yemen	Bangladesh	Belize	Sri Lanka	Nigeria	Tonga	Bolivia	Malaysia	El Salvador	Afghanistan	Mauritania	Guatemala	Myanmar	Zimbabwe	Mali	Suriname	Burkina Faso	Uganda	Jamaica	Indonesia	Sierra Leone
Private	632.32	1573.53	196.31	0.9	1	795.75	2930.33	1	7582.9	1025.9	196.48	4591.56	5	1152.6	175.15	45	4.54	2651.99	1115.01	2.7	142.4	53.5	1068.89	193	60.1	113.5	423.3	218.5	0	89	0	22	48	3.3	0	459.3	149.93	5	22	37.7	170	122	79.3	5	15	20.6	10	148.975	15.5
Public	519.46	2402.48	293.8	0.9	25	213.5	494.69	15.4667	3001.16	2069.9	121.27	678.7	30.5	1428.6	114.95	0	4.29	390.2	1586.54	1.2	105.9	94.48	920.395	329.2	484.1	77.5	742.64	204	60	106	0.48	121	63.45	0	203	0	240.13	26.05	160	52.8	0	180	91.5	0	261	10	97.3	241.475	15.5
[truncated: 27 more columns]

## Sheet: Figure 5
Figure 5
Table 1. Probability of private investment in a wind project, derived from results of 'random-effects' model for the post-Paris era
	Bolivia	Mauritania	Ethiopia	Sri Lanka	Kenya	Guatemala	Chad	Namibia	Libya	Dominican Republic	Philippines	El Salvador	Mozambique	Mongolia	Indonesia	Egypt	Pakistan	Peru	Morocco	Senegal	Costa Rica	Jordan	South Africa	Mexico	Vietnam	Brazil	Argentina
Wind	0.00725879	0.00725879	0.00725879	0.00725879	0.0088389	0.00883893	0.00883897	0.00883901	0.00883901	0.00883904	0.00883904	0.00883904	0.00883904	0.0189388	0.0189388	0.0189389	0.0189389	0.0189389	0.0290404	0.0290408	0.0492411	0.059346	0.0896515	0.109847	0.119949	0.15025	0.160354
Table 2. Probability of private investment in a solar project, derived from results of 'random-effects' model for the post-Paris era
	Bolivia	Cook Islands	Burundi	Niger	Eritrea	Jamaica	Nepal	Gambia	Cuba	Cameroon	Guiana	Marshall Islands	Burkina Faso	Cote d'Ivoire	Maldives	Costa Rica	Samoa	Afghanistan	Madagascar	Ghana	Nigeria	Peru	Somalia	Sierra Leone	Togo	Zimbabwe	Tonga	Tunisia	Zambia	Colombia	Mozambique	Tanzania	Pakistan	Dominican Republic	Honduras	Malawi	Bangladesh	Philippines	Morocco	El Salvador	Uganda	Mali	Cambodia	Malaysia	Mongolia	Argentina	Thailand	Senegal	Namibia
Solar	0.00210602	0.00210602	0.00210602	0.00210602	0.00210602	0.00210602	0.00210602	0.00210602	0.00210602	0.00270878	0.00270881	0.00270881	0.00270881	0.00270881	0.00270881	0.00270881	0.00270881	0.00270881	0.00270881	0.00270881	0.00270882	0.00270884	0.00270885	0.00270888	0.00270889	0.00270889	0.0027089	0.0058043	0.00580436	0.00580436	0.00580437	0.00580437	0.00890207	0.00890219	0.00890224	0.0119975	0.0119975	0.0119976	0.0150927	0.0150927	0.0150928	0.0150929	0.0181879	0.0212848	0.0212853	0.0212855	0.0243812	0.027478	0.0305738
Table 3. Total installed capacity in 2019 (MW), source: IEA
	Bolivia	Cook Islands	Burundi	Niger	Eritrea	Jamaica	Nepal	Gambia	Cuba	Cameroon	Guiana	Marshall Islands	Burkina Faso	Cote d'Ivoire	Maldives	Costa Rica	Samoa	Afghanistan	Madagascar	Ghana	Nigeria	Peru	Somalia	Sierra Leone	Togo	Zimbabwe	Tonga	Tunisia	Zambia	Colombia	Mozambique	Tanzania	Pakistan	Dominican Republic	Honduras	Malawi	Bangladesh	Philippines	Morocco	El Salvador	Uganda	Mali	Cambodia	Malaysia	Mongolia	Argentina	Thailand	Senegal	Namibia
Wind	27	0	0	0	0.83	99	0.2	1.21	11.75	0	0	0	0	0	1.41	410.92	0.55	0.4	0.18	0	0	376.16	3.55	0	0	0	1.52	244	0	18.42	0	0	1235.86	369.95	241.3	0	2.9	442.9	1225	0	0	0	0.25	0	156.01	1609.36	1506.82	50	5.23
Solar	120.32	7.27	5.1	27.04	19.96	92.5	50.74	2.18	159.3	14.19	46.7	1.63	62.39	13.14	13.15	48.45	13.52	31.09	33	87.68	27.96	330.77	7.07	4.38	5.47	11.07	6.23	80.05	96.43	92.35	95	26.6	713.3	196.26	515.8	22.75	239.08	972.9	733.9	403.21	76.96	19.3	124.01	882.02	89.22	442.11	2987.62	171	144.96
Total	5963.06	44.07	158.38	732.24	430.79	2425.63	1339.43	207.39	11971.7	2201.49	529.37	59.37	776.11	3572.42	559.06	4092.02	91.29	917.8	1441.21	8722.05	24022.1	24905.1	210.62	376.47	316.73	3592.13	43.15	12306	3585.43	23685.9	3517.37	3321.27	65182.4	9359.6	3785.63	690.19	42487	43839.9	17688.6	2999.47	1382.62	1293.2	3409.25	63495.9	2656.74	65148.8	92579	2183.5	864.06
[truncated: 9 more columns]

## Sheet: Figure S1
Supplementary Figure 1
Table 1. Total yearly wind and solar capacity additions from public and private sources (MW)
Year	2000	2001	2002	2003	2004	2005	2006	2007	2008	2009	2010	2011	2012	2013	2014	2015	2016	2017	2018	2019
Public	72.9	0	30.4	46.9	177.6	93.25	255.1	166.95	94.85	56.525	794.275	319.8	781.94	979.83	848.555	1846.61	985.315	4361.2	3431.8	3533.38
Private	22.86	0	0	10.2	0.5	0	20	153.3	468.95	337.525	444.675	877.57	2435.34	1352.7	2072.68	3327.22	1356.41	4648.29	6833.85	4839.35

## Sheet: Figure S2
Supplementary Figure 2
Table 1. Correlation matrix provides Pearson’s correlation coefficient between country features between 2010 and 2019 with a yearly resolution (see Supplementary Materials - Feature data)
	EF 2	Elec Access	RISE	ND Vuln	EDB	Cap Pub	Cap Pri	Cap Tot
EF 2	1	0.411089	0.339832	-0.453322	0.517277	0.377345	0.497094	0.472586
Elec Access	0.411089	1	0.327934	-0.735245	0.539356	0.299989	0.296829	0.346616
RISE	0.339832	0.327934	1	-0.448218	0.514097	0.430128	0.480526	0.489373
ND Vuln	-0.453322	-0.735245	-0.448218	1	-0.614113	-0.379671	-0.42753	-0.456129
EDB	0.517277	0.539356	0.514097	-0.614113	1	0.361582	0.390198	0.396249
Cap Pub	0.377345	0.299989	0.430128	-0.379671	0.361582	1	0.762574	0.921093
Cap Pri	0.497094	0.296829	0.480526	-0.42753	0.390198	0.762574	1	0.909402
Cap Tot	0.472586	0.346616	0.489373	-0.456129	0.396249	0.921093	0.909402	1

## Sheet: Figure S3
Supplementary Figure 3
Table 1. Probability of private investment in a wind project, derived from results of 'random-effects' model for the post-Paris era
	Bolivia	Mauritania	Ethiopia	Sri Lanka	Kenya	Guatemala	Chad	Namibia	Libya	Dominican Republic	Philippines	El Salvador	Mozambique	Mongolia	Indonesia	Egypt	Pakistan	Peru	Morocco	Senegal	Costa Rica	Jordan	South Africa	Mexico	Vietnam	Brazil	Argentina
Wind	0.00725879	0.00725879	0.00725879	0.00725879	0.0088389	0.00883893	0.00883897	0.00883901	0.00883901	0.00883904	0.00883904	0.00883904	0.00883904	0.0189388	0.0189388	0.0189389	0.0189389	0.0189389	0.0290404	0.0290408	0.0492411	0.059346	0.0896515	0.109847	0.119949	0.15025	0.160354
Table 2. Probability of private investment in a solar project, derived from results of 'random-effects' model for the post-Paris era
	Bolivia	Cook Islands	Burundi	Niger	Eritrea	Jamaica	Nepal	Gambia	Cuba	Cameroon	Guiana	Marshall Islands	Burkina Faso	Cote d'Ivoire	Maldives	Costa Rica	Samoa	Afghanistan	Madagascar	Ghana	Nigeria	Peru	Somalia	Sierra Leone	Togo	Zimbabwe	Tonga	Tunisia	Zambia	Colombia	Mozambique	Tanzania	Pakistan	Dominican Republic	Honduras	Malawi	Bangladesh	Philippines	Morocco	El Salvador	Uganda	Mali	Cambodia	Malaysia	Mongolia	Argentina	Thailand	Senegal	Namibia
Solar	0.00210602	0.00210602	0.00210602	0.00210602	0.00210602	0.00210602	0.00210602	0.00210602	0.00210602	0.00270878	0.00270881	0.00270881	0.00270881	0.00270881	0.00270881	0.00270881	0.00270881	0.00270881	0.00270881	0.00270881	0.00270882	0.00270884	0.00270885	0.00270888	0.00270889	0.00270889	0.0027089	0.0058043	0.00580436	0.00580436	0.00580437	0.00580437	0.00890207	0.00890219	0.00890224	0.0119975	0.0119975	0.0119976	0.0150927	0.0150927	0.0150928	0.0150929	0.0181879	0.0212848	0.0212853	0.0212855	0.0243812	0.027478	0.0305738
Table 3. Total installed capacity in 2019 (MW), source: IEA
	Bolivia	Cook Islands	Burundi	Niger	Eritrea	Jamaica	Nepal	Gambia	Cuba	Cameroon	Guiana	Marshall Islands	Burkina Faso	Cote d'Ivoire	Maldives	Costa Rica	Samoa	Afghanistan	Madagascar	Ghana	Nigeria	Peru	Somalia	Sierra Leone	Togo	Zimbabwe	Tonga	Tunisia	Zambia	Colombia	Mozambique	Tanzania	Pakistan	Dominican Republic	Honduras	Malawi	Bangladesh	Philippines	Morocco	El Salvador	Uganda	Mali	Cambodia	Malaysia	Mongolia	Argentina	Thailand	Senegal	Namibia
Wind	27	0	0	0	0.83	99	0.2	1.21	11.75	0	0	0	0	0	1.41	410.92	0.55	0.4	0.18	0	0	376.16	3.55	0	0	0	1.52	244	0	18.42	0	0	1235.86	369.95	241.3	0	2.9	442.9	1225	0	0	0	0.25	0	156.01	1609.36	1506.82	50	5.23
Solar	120.32	7.27	5.1	27.04	19.96	92.5	50.74	2.18	159.3	14.19	46.7	1.63	62.39	13.14	13.15	48.45	13.52	31.09	33	87.68	27.96	330.77	7.07	4.38	5.47	11.07	6.23	80.05	96.43	92.35	95	26.6	713.3	196.26	515.8	22.75	239.08	972.9	733.9	403.21	76.96	19.3	124.01	882.02	89.22	442.11	2987.62	171	144.96
Total	5963.06	44.07	158.38	732.24	430.79	2425.63	1339.43	207.39	11971.7	2201.49	529.37	59.37	776.11	3572.42	559.06	4092.02	91.29	917.8	1441.21	8722.05	24022.1	24905.1	210.62	376.47	316.73	3592.13	43.15	12306	3585.43	23685.9	3517.37	3321.27	65182.4	9359.6	3785.63	690.19	42487	43839.9	17688.6	2999.47	1382.62	1293.2	3409.25	63495.9	2656.74	65148.8	92579	2183.5	864.06
Share of renewables in electricity mix (%)	0.0247054	0.164965	0.032201	0.0369278	0.0482602	0.0789486	0.0380311	0.016346	0.0142878	0.00644563	0.0882181	0.0274549	0.0803881	0.00367818	0.0260437	0.11226	0.154124	0.0343103	0.0230223	0.0100527	0.00116393	0.0283849	0.0504226	0.0116344	0.0172702	0.00308174	0.179606	0.0263326	0.026895	0.00467662	0.0270088	0.00800898	0.0299031	0.0604951	0.199993	0.0329619	0.00569539	0.0322948	0.110743	0.134427	0.0556624	0.0149242	0.0364479	0.013891	0.0923049	0.031489	0.0485471	0.101214	0.173819
[truncated: 9 more columns]
